# Supplementary material
Source: PubMed Central journal article supplement (PMC3659991)
Supplement: supp_2012.073965_2012.073965.CAYE_SUPPL.pdf [file supp_2012.073965_2012.073965.CAYE_SUPPL.pdf]

# Breakpoint-specific multiplex polymerase chain reaction allows the detection of *IKZF1* intragenic deletions and minimal residual disease monitoring in B-cell precursor acute lymphoblastic leukemia

Aurélie Caye,<sup>1</sup> Kheïra Beldjord,<sup>2,3</sup> Kelly Mass-Malo,<sup>1</sup> Séverine Drunat,<sup>1</sup> Jean Soulier,<sup>2,3</sup> Virginie Gandemer,<sup>4</sup> André Baruchel,<sup>3,5</sup> Yves Bertrand,<sup>6</sup> Hélène Cavé,<sup>1,3</sup> and Emmanuelle Clappier<sup>1,3</sup>

<sup>1</sup>Département de Génétique, UF de Génétique Moléculaire, Hôpital Robert Debré, APHP; <sup>2</sup>Service d'Hématologie Biologique, Hôpital Saint-Louis, APHP, Paris; <sup>3</sup>Université Paris Diderot-Paris 7; <sup>4</sup>Service d'Hématologie Pédiatrique, CHU-Hôpital Sud, Rennes; <sup>5</sup>Service d'Hématologie Pédiatrique, Hôpital Robert Debré, APHP, Paris; and <sup>6</sup>Institut d'Hématologie et d'Oncologie Pédiatrique, Lyon

©2013 Ferrata Storti Foundation. This is an open-access paper. doi:10.3324/haematol.2012.073965

Online Supplementary Table S1i. Distal breakpoints centromeric to *IKZF1* exon 8.

| ALL identifier           | Type of deletion | Additional nucleotides | Position | Distal                                     |
|--------------------------|------------------|------------------------|----------|--------------------------------------------|
| CGH #1                   | Δ(4-8)           | –                      | 50484458 | gacatgctggctctctccctgtagccgagac            |
| CGH #2                   | Δ(4-8)           | acaccttcgcg            | 50484456 | ctgacatgctggctctctccctgtagccgagac          |
| CGH #3                   | Δ(4-8)           | cccgtggga              | 50483900 | ttctttcttccccacatcaagggtctacgtggaatagtg    |
| BCR-ABL1 #4151 allele 2  | Δ(4-8)           | cccccg                 | 50484460 | catgctggctctctccctgtagccgagac              |
| BCR-ABL1 #8987           | Δ(4-8)           | gg                     | 50484451 | gtgggctgacatgctggctctctccctgtagccgagac     |
| BCR-ABL1 #9653           | Δ(4-8)           | aaggg                  | 50484453 | gggctgacatgctggctctctccctgtagccgagac       |
| BCR-ABL1 #12259 allele 2 | Δ(4-8)           | ctgtggcg               | 50484458 | gacatgctggctctctccctgtagccgagac            |
| BCR-ABL1 #12259 allele 1 | Δ(2-8)           | gt                     | 50484456 | ctgacatgctggctctctccctgtagccgagac          |
| BCR-ABL1 #13175          | Δ(4-8)           | ca                     | 50484453 | gggctgacatgctggctctctccctgtagccgagac       |
| BCR-ABL1 #11599 allele 2 | Δ(2-8)           | ccc                    | 50469606 | ccacacatacataggatggctgctgcacctgtagga       |
| Germline                 |                  |                        | 50484447 | aggtgtgggctgacatgctggctctctccctgtagccgagac |

Online Supplementary Table S1ii. Proximal breakpoints in *IKZF1* intron 1.

| ALL identifier           | Type of deletion | Proximal                                      | Position | Additional nucleotides |
|--------------------------|------------------|-----------------------------------------------|----------|------------------------|
| BCR-ABL1 #12259 allele 1 | Δ(2-8)           | catatgcacacagagcgtgcacaca                     | 50346601 | gt                     |
| BCR-ABL1 #10066          | Δ(2-7)           | catatgcacacagagcgtgcacacacacagcatg            | 50346610 | ct                     |
| BCR-ABL1 #5192           | Δ(2-7)           | aaggagattgatgaagtggctccactccagcttacaga        | 50346975 | cc                     |
| BCR-ABL1 #2594           | Δ(2-7)           | gatctaggtcttagaacgtagag                       | 50347368 | cttcg                  |
| BCR-ABL1 #4006 allele 1  | Δ(2-7)           | gatctaggtcttagaacgtagag                       | 50347369 | cgggacgc               |
| BCR-ABL1 #10168 allele 2 | Δ(2-7)           | gatctaggtcttagaacgtagagtttcagaggatcagc        | 50347383 | ccccaaa                |
| BCR-ABL1 #3128           | Δ(2-7)           | gatctaggtcttagaacgtagagtttcagaggatcagc        | 50347383 | tcc                    |
| BCR-ABL1 #10819          | Δ(2-7)           | gatctaggtcttagaacgtagagtttcagaggatcagcattatac | 50347390 | ccc                    |
| BCR-ABL1 #11599 allele 2 | Δ(2-8)           | agccattgtgttctccgtctccctgct                   | 50348575 | ccc                    |

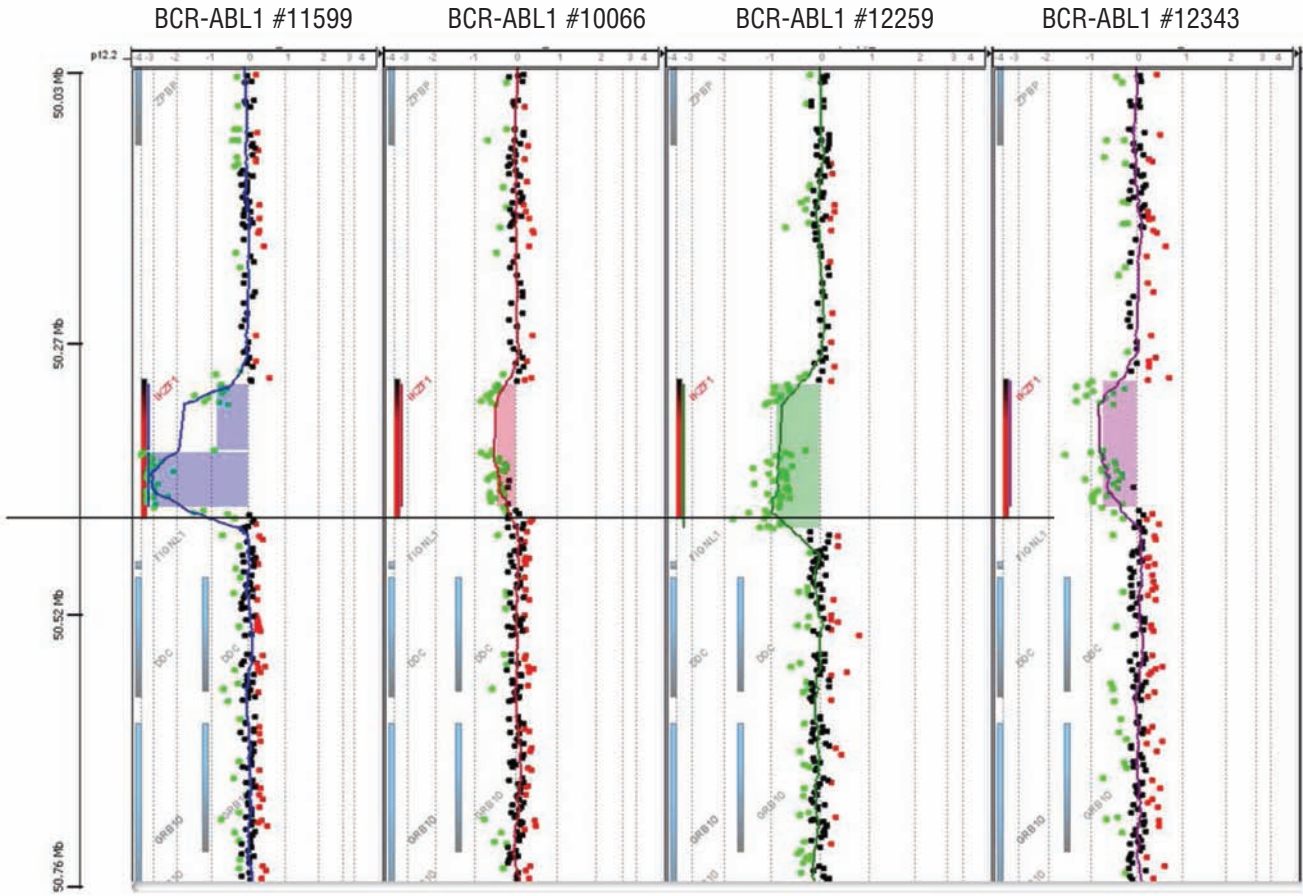

Online Supplementary Figure S1. Array-CGH plots showing *IKZF1* intragenic deletions with variant breakpoints mapped. Case #11599 has  $\Delta(2-8)$  and  $\Delta(4-7)$ ; case #10066 has  $\Delta(2-7)$ ; case #12259 has  $\Delta(2-8)$  and minor  $\Delta(4-8)$ ; case #12343 has  $\Delta(2-7)$ . Moving average is in colored full line; aberration prediction by ADM-2 algorithm is shown in transparent color.

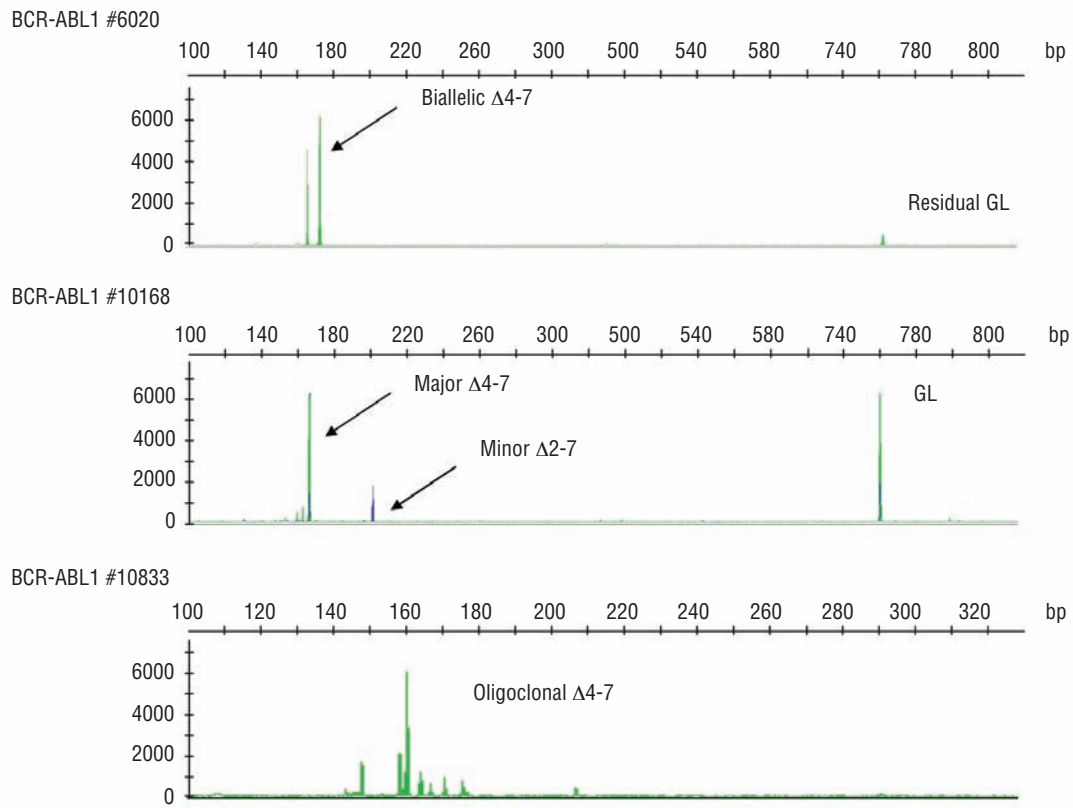

Online Supplementary Figure S2. Genescan patterns showing examples of ALL cases harboring multiple *IKZF1* intragenic deletions. GL, germline, indicates the 760 bp control amplicon.
