# Supplementary material
Source: PubMed Central journal article supplement (PMC3659991)
Supplement: supp_2012.073965_2012_073965-Contributions.pdf [file supp_2012.073965_2012_073965-Contributions.pdf]

# haematologica *the hematology journal*

*author contribution form*

|                     |                                                                                                                                                                                                                   |
|---------------------|-------------------------------------------------------------------------------------------------------------------------------------------------------------------------------------------------------------------|
| <b>Title</b>        | <b>Breakpoint-specific multiplex polymerase chain reaction allows the detection of <i>IKZF1</i> intragenic deletions and minimal residual disease monitoring in B-cell precursor acute lymphoblastic leukemia</b> |
| <b>First author</b> | Aurélie Caye                                                                                                                                                                                                      |

According to the International Committee of Medical Journal Editors (ICMJE)

([http://www.icmje.org/ethical\\_1author.html](http://www.icmje.org/ethical_1author.html)):

*“Authorship credit should be based on: 1) substantial contributions to conception and design, acquisition of data, or analysis and interpretation of data; 2) drafting the article or revising it critically for important intellectual content; and 3) final approval of the version to be published. Authors should meet conditions 1, 2 and 3. Acquisition of funding, collection of data, or general supervision of the research group alone does not constitute authorship”.*

**The responsible author(s) of this manuscript confirm(s) that all persons designated as authors qualify for authorship, and that each author has participated sufficiently in the work to take public responsibility for appropriate portions of the content.**

*Specific contributions of each author are listed on page 2 of this document.*

**Responsible author(s):**

*author(s) responsible for the integrity of the work as a whole*

Name: Emmanuelle Clappier  
Institute: Département de Génétique, UF de Génétique moléculaire, Hôpital Robert Debré, APHP ; Université Paris Diderot, France  
e-mail: emmanuelle.clappier@rdb.aphp.fr

**Author contributions (maximum 1 page):**

*Please describe the contributions of each author, indicating who was responsible for each part of the study and the preparation of the manuscript (collection of data, experiments, data analysis, generation of figures, collection of images, interpretation of data, preparation of the text, etc.)*

Aurélie Caye designed the work, performed experiments, analyzed the data and generated figures.

Kelly Mass-Malo performed experiments.

Kheïra Beldjord designed the work and analyzed the data.

Séverine Drunat contributed to MLPA analysis.

Jean Soulier provided CGH-array data.

Virginie Gandemer, André Baruchel and Yves Bertrand recruited the patients and coordinated the clinical trials.

Hélène Cavé designed the work, collected samples and wrote the paper.

Emmanuelle Clappier designed the work, analyzed the data, generated figures and wrote the paper.

All the authors reviewed the final version of the manuscript.
